1 **Impact of low relative skeletal muscle mass and power on the**  
2 **development of metabolic syndrome in Japanese women: a 7-year**  
3 **prospective study**

4

5 Yosuke Yamada<sup>1\*</sup>, Haruka Murakami<sup>1,2</sup>, Ryoko Kawakami<sup>1,3</sup>, Yuko Gando<sup>1,4</sup>, Hinako  
6 Nanri<sup>1</sup>, Takashi Nakagata<sup>1</sup>, Daiki Watanabe<sup>1</sup>, Tsukasa Yoshida<sup>1</sup>, Yoichi Hatamoto<sup>1</sup>,  
7 Eiichi Yoshimura<sup>1</sup>, Kiyoshi Sanada<sup>2</sup>, Nobuyuki Miyatake<sup>5</sup>, Motohiko Miyachi<sup>1,3</sup>

8

9 1 National Institute of Health and Nutrition, National Institutes of Biomedical  
10 Innovation, Health and Nutrition, Tokyo 162-8636, Japan;  
11 yamaday@nibiohn.go.jp, hnanri@nibiohn.go.jp, takashi.nakagata@gmail.com,  
12 d2watanabe@nibiohn.go.jp, t-yoshida@nibiohn.go.jp, yhatamoto@nibiohn.go.jp,  
13 eyoshi@nibiohn.go.jp  
14 2 Faculty of Sport and Health Science, Ritsumeikan University, Kusatsu, Shiga 525-  
15 8577, Japan; haruka-m@fc.ritsumei.ac.jp, ksanada@fc.ritsumei.ac.jp  
16 3 Faculty of Sport Sciences, Waseda University, Tokorozawa, Saitama 359-1192,  
17 Japan; r.kawakami@aoni.waseda.jp, miyachim@waseda.jp  
18 4 Faculty of Sport Science, Surugadai University, Hanno, Saitama, 357-8555, Japan;  
19 gando.yuko@surugadai.ac.jp  
20 5 Department of Hygiene, Faculty of Medicine, Kagawa University, Miki, Kagawa,  
21 761-0793, Japan; miyatake.nobuyuki@kagawa-u.ac.jp

22

23

NOTE: This preprint reports new research that has not been certified by peer review and should not be used to guide clinical practice.

24 \* Correspondence: Yosuke Yamada, PhD  
25 National Institute of Health and Nutrition, National Institutes of Biomedical  
26 Innovation, Health and Nutrition, 1-23-1, Toyama, Shinjuku-ku, Tokyo 162-8636,  
27 Japan; yamaday@nibiohn.go.jp  
28  
29

30 **Abstract:** Previous cross-sectional studies indicated that low relative skeletal muscle  
31 mass against body weight (appendicular lean mass divided by body weight, ALM/Wt or  
32 divided by body mass index, ALM/BMI) was negatively associated with metabolic  
33 syndrome (MetS). The aim of this longitudinal study was to investigate the impact of  
34 low relative skeletal muscle mass and leg muscle power on the development of MetS in  
35 Japanese women in a 7-y prospective study. Subjects were 346 Japanese women aged  
36 26 to 85 years. The reference values for Class I sarcopenia were defined as values one  
37 SD below the sex-specific means of the young group. The longitudinal relation between  
38 muscle mass or leg power and development of MetS was examined using Kaplan-Meier  
39 curves and Cox regression models (average follow-up duration 7 years, range 1 to 10  
40 years). During follow-up, 24 of subjects developed MetS. Both indices of ALM/Wt or  
41 ALM/BMI, the incidence of MetS was higher in Class I sarcopenia group than normal  
42 muscle mass group even after controlling variables (adjusted hazard ratio [AHR] = 3.22  
43 [95%CI; 1.25-8.27] for ALM/Wt and 3.19 [95%CI; 1.31-7.74] for ALM/BMI). In  
44 contrast, for the leg power per body weight, the incidence of MetS was not significantly  
45 different between low leg power and normal leg power groups (AHR = 1.23 [95%CI;  
46 0.50-3.04]). Current longitudinal study indicated that low relative skeletal muscle mass  
47 but not low leg power was independent risk factors for the development of MetS in  
48 Japanese women.

49

50 **Keywords:** relative skeletal muscle mass, sarcopenia, muscle power, metabolic  
51 syndrome, longitudinal study

52

## 53 1. Introduction

54 Skeletal muscle mass (SMM) and its function are considered important biomarkers  
55 of aging [1-3]. Age-related loss of SMM and its function is called as sarcopenia [4]. In  
56 current measurable definition of sarcopenia is based on SMM and grip strength and/or  
57 lower body physical performance [1, 2]. Skeletal muscle is a metabolically active organ  
58 to mediate energy metabolism and exert beneficial effects on metabolic health [5, 6].  
59 Thus, higher muscle mass or muscle function might have beneficial effect on preventing  
60 metabolic syndrome (MetS) as well [7-11]. MetS is a cluster of conditions that occur  
61 together, increasing the risk of heart disease, stroke and type 2 diabetes. These conditions  
62 include the accumulation of visceral fat, increased blood pressure, dyslipidemia, and  
63 hyperglycemia.

64 However, because the people who have higher body weight tend have higher muscle  
65 mass and strength, previous studies indicated that the normalization of muscle mass and  
66 strength by body weight or body mass index (BMI) is needed to see the association  
67 between skeletal muscle mass or strength and MetS [7-14]. Previous cross-sectional  
68 studies indicated that relative appendicular lean mass per kg weight or per body mass  
69 index is inversely associated with MetS [7-14]. The present longitudinal study aimed to  
70 examine the impact of low relative skeletal muscle mass and power on the development  
71 of MetS in Japanese women.

72

## 73 2. Materials and Methods

### 74 2.1. Ethics approval and consent to participate

75 The study was performed in accordance with the guidelines of the Declaration of  
76 Helsinki. All procedures were reviewed and approved by the ethics committees of the  
77 National Institutes of Biomedical Innovation, Health and Nutrition (6008, Kenei14-02).  
78 All participants provided written consent for participation in the study.

79

### 80 2.2. Participants

81 The participants were recruited from the community around the National Institute of  
82 Health and Nutrition, Tokyo, Japan. From a total of 760 women, 346 women aged 26 to  
83 85 years old (mean and SD of age,  $\pm$  years) were included in the current study who met  
84 the following criteria: (1) they received anthropometric and physical activity  
85 measurements, (2) underwent blood examinations, (3) dietary intake assessments, (4) no  
86 history of MetS at the baseline measurement, and (5) underwent follow-up examinations.

87

### 88 2.3. Anthropometric and leg power measures

89 Height, weight, and waist circumference were measured and body mass index  
90 was calculated. Body composition was determined by bioelectrical impedance analysis  
91 (TANITA BC-600). The appendicular lean mass (ALM; kg) were obtained from the  
92 sum of the four limbs (right and left upper and lower limbs). The skeletal muscle index

93 (SMI) was calculated as ALM divided by body weight  $\times$  100 (%). The reference values  
94 for Class I sarcopenia were defined as values one SD below the sex-specific means of  
95 the young group, and 28.0% was the cutoff value for Class I sarcopenia. In addition,  
96 ALM divided by BMI (ALM/BMI) was also calculated based on FNIH  
97 recommendation. The cutoff value for Class I sarcopenia of ALM/BMI was 0.670. We  
98 used these values to divide the subject into normal muscle mass group and Class I  
99 sarcopenia group. No women fell into Class II sarcopenia in the current subjects.

100 The leg extension power was measured by using a dynamometer (Anaero Press  
101 3500; Combi Wellness, Tokyo, Japan) in the sitting position [15]. The subjects were  
102 advised to vigorously extend their legs. 5 trials were performed at 15-s intervals, and the  
103 average of the 2 highest recorded power outputs (watt; W) was taken as the definitive  
104 measurement. The leg extension power divided by body weight was obtained.

105

#### 106 *2.4. Physical Activity*

107 The duration and intensity of physical activity were evaluated by a triaxial  
108 accelerometer (Actimarker EW4800; Panasonic, Osaka, Japan) [16, 17], as described  
109 previously [15]. Participants were asked to wear the physical activity monitor on their hip  
110 for 28 days; we used data for 14 days, during which the accelerometer was worn  
111 continuously from the time the participant awoke until she went to bed. Total volume of  
112 physical activity (METs  $\times$  hour) was obtained.

113

#### 114 *2.5. Blood samples*

115 Blood samples were taken from participants following an overnight fast of at least  
116 10 hours [18]. Venous blood withdrawn from the antecubital vein was collected into tubes  
117 without additives or EDTA and was immediately centrifuged at 3000 rpm for 20 minutes  
118 to obtain serum or plasma. The levels of glucose, HbA1c, homeostasis model assessment  
119 of insulin resistance (HOMA-IR), and HOMA- $\beta$  in plasma and total cholesterol, high-  
120 density and low-density lipoprotein (HDL and LDL) cholesterol, and triglycerides in  
121 serum were determined [15].

122 According to the definition released by the Japanese Committee for the Diagnostic  
123 Criteria of Metabolic Syndrome in April 2005, we defined metabolic syndrome as the  
124 presence of 2 or more abnormalities in addition to visceral obesity (waist circumference:  
125 85 cm or more in men, 90 cm or more in women). These three abnormalities are as  
126 follows: 1, triglycerides  $\geq 150$  mg/dL and/or HDL-cholesterol  $< 40$  mg/dL or under  
127 treatment for this type of dyslipidemia, 2, systolic blood pressure  $\geq 130$  and/or diastolic  
128 blood pressure  $\geq 85$ , or under treatment for hypertension, 3, fasting glucose  $\geq 110$  mg/dL  
129 or under treatment for diabetes [19].

130

## 131 2.6. *Statistical analysis*

132 Results are presented as mean  $\pm$  standard deviation (SD). Differences were  
133 analyzed using ANOVA. Cumulative event rates for incident MetS were estimated by  
134 Kaplan-Meier curves, and the equalities were compared with the log-rank test. Cox  
135 proportional hazard analysis was performed to determine the independent association  
136 between either baseline SMI, ALM/BMI, or leg power against other variables. For

137 multivariate analysis, model 1 was a crude form; age was adjusted for in model 2; model  
138 3 included model-2 adjustment and family history of diabetes, smoking status, and  
139 physical activity. Alpha of 0.05 was employed to denote significant statistical deviation.  
140 We performed all analyses using IBM SPSS Statistics for Windows, version 22.0 (IBM  
141 Corp., Armonk, NY).

142



### 143 3. Results

144 Table 1 shows the baseline characteristics of the subjects according to SMI group.  
145 The subjects with Class I sarcopenia had higher weight, waist circumference, fasting  
146 glucose, HOMA-IR, SBP, DBP, triglycerides, and LDL cholesterol compared with  
147 normal SMI subjects. In contrast, the subjects with Class I sarcopenia had lower SMI,  
148 ALM/BMI, and leg power compared with normal SMI subjects.

149 Kaplan-Meier curves for events of incident MetS according to baseline SMI. Fig 1  
150 shows the Kaplan-Meier curves for events of incident MetS according to baseline SMI,  
151 and the subjects with Class I sarcopenia defined by SMI had significantly higher incident  
152 of MetS during follow-up period ( $P = 0.018$ ). Fig. 2 shows the subjects with Class I  
153 sarcopenia defined by ALM/BMI had also significantly higher incident of MetS ( $P <$   
154  $0.001$ ). In contrast, high ALM/height<sup>2</sup> or high absolute ALM had significantly higher  
155 incident of MetS ( $P < 0.001$ ). Fig. 3 shows the Kaplan-Meier curves for events of incident  
156 MetS according to baseline leg power, and the subjects with low leg power had  
157 significantly higher incident of MetS ( $P = 0.032$ ).

158 Cox proportional hazard regression analyses were performed in Table 2. We found  
159 that the subjects with Class I sarcopenia defined by SMI or ALM/BMI was significantly  
160 associated with an increased adjusted hazard ratio (AHR) for incident MetS (3.22, 95%CI  
161 1.25-8.27 for SMI, and 3.19, 95%CI 1.31-7.74 for ALM/BMI) compared with the  
162 subjects with normal relative skeletal muscle mass, after adjusting age, family history of  
163 diabetes, smoking status, and physical activity. In contrast, for the leg power per body  
164 weight, the incidence of MetS was not significantly different between low leg power and  
165 normal leg power groups after adjusting those variables (AHR = 1.23, 95%CI; 0.50-3.04).

166

#### 167 **4. Discussion**

168         The major findings of this 7-year prospective study was subjects with Class I  
169 sarcopenia defined by SMI ( $\text{ALM}/\text{weight} \times 100\%$ ) or ALM/BMI was significantly  
170 associated with an increased adjusted HR for incident MetS compared with the subjects  
171 with normal skeletal muscle mass, after adjusting age, family history of diabetes, smoking  
172 status, and physical activity. In contrast, the incidence of MetS was not significantly  
173 different between low leg power and normal leg power groups after adjusting those  
174 variables.

175         Skeletal muscle mass (SMM) is strongly correlated with body size [20]. Thus,  
176 EWGSOP2 stated that “when quantifying muscle mass, the absolute level of SMM or  
177 ALM can be adjusted for body size in different ways, namely using height squared  
178 ( $\text{ALM}/\text{height}^2$ ), weight ( $\text{ALM}/\text{weight}$ ) or body mass index ( $\text{ALM}/\text{BMI}$ ) [2].” Preferred  
179 adjustment has been a subject of debate. Janssen et al. indicated that  $\text{SMM}/\text{weight}$  is  
180 associated with functional impairment and disability in NHANES III participants aged 18  
181 and older [21]. Janssen also indicated that  $\text{SMM}/\text{height}^2$  is associated with physical  
182 disability in the subjects aged 65 and older in Cardiovascular Health Study (CHS)  
183 database [22]. Furushima et al. indicated low  $\text{ALM}/\text{height}^2$  is associated with bone  
184 mineral density but not with MetS variables, and  $\text{ALM}/\text{weight}$  is associated with MetS  
185 variables but not with bone mineral density [13]. Many previous studies also indicated  
186 that  $\text{ALM}/\text{weight}$  is associated with MetS [9-13]. A recent study found the significant  
187 association between low  $\text{ALM}/\text{weight}$  and MetS development in a 7-year retrospective

188 study [23]. The result of the current study is consistent with those cross-sectional studies  
189 or the retrospective study, and this is the first prospective study to examine the association  
190 of low ALM/weight or ALM/BMI and MetS development, to the best of our knowledge.  
191 On the contrary, high ALM/height<sup>2</sup> or high absolute ALM had significantly higher  
192 incident of MetS during the follow-up period. This is consistent with the recent cross-  
193 sectional study [24] and previous studies [7-14]. It is because the people who have higher  
194 body weight tend have higher muscle mass. Therefore, the normalization of muscle mass  
195 by body weight or BMI is needed to examine the association between SMM and MetS.

196 The association between muscle strength or power and MetS has also been  
197 examined. Jurca et al. indicated that low muscular strength index computed by combining  
198 the one-repetition maximum score for the bench press and the leg press expressed as  
199 weight lifted per kilogram body weight was significantly associated with high prevalence  
200 of MetS [7, 8]. Very recently, Zhang et al. examined the association between the  
201 prevalence of MetS and absolute or relative values of muscle strength in women [14].  
202 They concluded that the prevalence of MetS increased with low relative grip and leg  
203 strengths (per kilogram body weight). Conversely, low absolute muscle strength was  
204 associated with low MetS prevalence [14]. The current longitudinal study showed the  
205 significant association between low relative muscle power and the development of MetS,  
206 but the association was no more significant after adjusting age, family history of diabetes,  
207 smoking status, and physical activity.

208 Several mechanisms may affect the association between low relative skeletal  
209 muscle mass and development of MetS, including physical inactivity, malnutrition,  
210 insulin resistance, inflammation, and myokines [11]. Skeletal muscle is the main site of

211 glucose uptake and utilization. Low relative skeletal muscle mass may increase insulin  
212 resistance and thereby induce MetS. Actually, the HOMA-IR was negatively associated  
213 with low relative muscle mass.

214         This study has several limitations. First, because of limited sample size, we could  
215 not test many adjusting variables in this study. There may be possible cofounders between  
216 low relative skeletal muscle mass and development of MetS. Second, the muscle quality  
217 and composition, such as fat infiltration [25, 26], fibrosis [27, 28], relative expansion of  
218 extracellular compartments [3, 29, 30], are important issue to assess muscle tissues.  
219 However, we could only assess ASM in this study. Further studies are needed to address  
220 this issue. Third, recently, BIA is used many studies to assess ASM, but the BIA method  
221 is a secondary indirect method to estimate body composition [31]. BIA is possibly  
222 influenced by edema, exercise, circadian and seasonal variations [32-34]. Although BIA  
223 was measured in the morning without any exercise and fasting state in this study, still  
224 seasonal variations may affect the current results.

225

## 226 **5. Conclusions**

227         In conclusion, our results show the relative skeletal muscle mass against body  
228 weight (ALM/weight) or body mass index (ALM/BMI) is negatively associated the future  
229 development of MetS. The relative skeletal muscle mass was negatively associated with  
230 HOMA-IR. To maintain the relative skeletal muscle mass is important to prevent  
231 developing MetS in Japanese women.

232

233 **Funding:** The study was funded by the Ministry of Health, Labour and Welfare (Health  
234 and Labour Sciences Research Grant: 200825016B and 201222028B).

235

236 **Acknowledgments:** The authors thank Dr. Kumpei Tanisawa, Dr. Harumi Ohno, Dr.  
237 Kana Konishi, Dr. Michiya Tanimoto, Dr. Noriko Tanaka, Dr. Hiroshi Kawano, Dr.  
238 Kenta Yamamoto, Dr. Motoyuki Iemitsu, Ms. Azusa Sasaki, Ms. Yumi Ohmori, Ms. Rie  
239 Katayama, Mr. Zhenbo Cao, Ms. Eriko Kubo, Ms. Miyuki Hayashi, Mr. Satoshi Hanawa,  
240 Ms. Naeko Kurose, Ms. Aiko Hirosako, Ms. Sayaka Nakamura, Ms. Hidemi Hara, Ms.  
241 Miki Yoshida, Mr. Satoshi Kurita, Ms. Noriko Wada, Ms. Miho Okamoto, Ms. Hisako  
242 Ito, Ms. Kinue Nakajima, Ms. Kaori Sato, Ms. Akie Morishita, and Ms. Kazumi Kajiwara,  
243 who significantly contributed to the realization of this study through their long-term  
244 involvement as researchers or research assistants. Moreover, the authors would like to  
245 express their gratitude to all the subjects who participated in the study and to all research  
246 professionals involved in the NEXIS protocol.

247

248 **Conflicts of Interest:** There is no conflicts of interest in this study.

249

250

## 251 **References**

- 252 1. Chen LK, Woo J, Assantachai P, Auyeung TW, Chou MY, Iijima K, et al. Asian  
253 Working Group for Sarcopenia: 2019 Consensus Update on Sarcopenia Diagnosis  
254 and Treatment. *J Am Med Dir Assoc*. 2020;21(3):300-7.e2. Epub 2020/02/09. doi:  
255 10.1016/j.jamda.2019.12.012. PubMed PMID: 32033882.
- 256 2. Cruz-Jentoft AJ, Bahat G, Bauer J, Boirie Y, Bruyère O, Cederholm T, et al.  
257 Sarcopenia: revised European consensus on definition and diagnosis. *Age Ageing*.  
258 2019;48(1):16-31. Epub 2018/10/13. doi: 10.1093/ageing/afy169. PubMed PMID:  
259 30312372; PubMed Central PMCID: PMC6322506.
- 260 3. Yamada Y, Buehring B, Krueger D, Anderson RM, Schoeller DA, Binkley N.  
261 Electrical properties assessed by bioelectrical impedance spectroscopy as  
262 biomarkers of age-related loss of skeletal muscle quantity and quality. *The Journals*  
263 *of Gerontology Series A: Biological Sciences and Medical Sciences*.  
264 2017;72(9):1180-6. doi: 10.1093/gerona/glw225.
- 265 4. Cruz-Jentoft AJ, Sayer AA. Sarcopenia. *The Lancet*. 2019;393(10191):2636-46.  
266 doi: 10.1016/S0140-6736(19)31138-9.
- 267 5. Usui C, Takahashi E, Gando Y, Sanada K, Oka J, Miyachi M, et al. Resting energy  
268 expenditure can be assessed by dual-energy X-ray absorptiometry in women  
269 regardless of age and fitness. *Eur J Clin Nutr*. 2009;63(4):529-35. Epub 2008/02/21.  
270 doi: 10.1038/sj.ejcn.1602980. PubMed PMID: 18285810.
- 271 6. Wang Z, Ying Z, Bosy-Westphal A, Zhang J, Schautz B, Later W, et al. Specific  
272 metabolic rates of major organs and tissues across adulthood: evaluation by  
273 mechanistic model of resting energy expenditure. *The American journal of clinical*  
274 *nutrition*. 2010;92(6):1369-77. Epub 10/20. doi: 10.3945/ajcn.2010.29885.  
275 PubMed PMID: 20962155.
- 276 7. Jurca R, Lamonte MJ, Church TS, Earnest CP, Fitzgerald SJ, Barlow CE, et al.  
277 Associations of muscle strength and fitness with metabolic syndrome in men. *Med*  
278 *Sci Sports Exerc*. 2004;36(8):1301-7. Epub 2004/08/05. doi:  
279 10.1249/01.mss.0000135780.88930.a9. PubMed PMID: 15292736.
- 280 8. Jurca R, Lamonte MJ, Barlow CE, Kampert JB, Church TS, Blair SN. Association  
281 of muscular strength with incidence of metabolic syndrome in men. *Med Sci Sports*  
282 *Exerc*. 2005;37(11):1849-55. Epub 2005/11/16. doi:  
283 10.1249/01.mss.0000175865.17614.74. PubMed PMID: 16286852.
- 284 9. Kim Y, Han BD, Han K, Shin KE, Lee H, Kim TR, et al. Optimal cutoffs for low  
285 skeletal muscle mass related to cardiovascular risk in adults: The Korea National  
286 Health and Nutrition Examination Survey 2009-2010. *Endocrine*. 2015;50(2):424-

- 287 33. Epub 2015/04/12. doi: 10.1007/s12020-015-0577-y. PubMed PMID:  
288 25862070.
- 289 10. Mesinovic J, McMillan LB, Shore-Lorenti C, De Courten B, Ebeling PR, Scott D.  
290 Metabolic Syndrome and Its Associations with Components of Sarcopenia in  
291 Overweight and Obese Older Adults. *Journal of clinical medicine*. 2019;8(2). Epub  
292 2019/01/30. doi: 10.3390/jcm8020145. PubMed PMID: 30691198; PubMed  
293 Central PMCID: PMC6406767.
- 294 11. Kim SH, Jeong JB, Kang J, Ahn DW, Kim JW, Kim BG, et al. Association between  
295 sarcopenia level and metabolic syndrome. *PloS one*. 2021;16(3):e0248856. Epub  
296 2021/03/20. doi: 10.1371/journal.pone.0248856. PubMed PMID: 33739984;  
297 PubMed Central PMCID: PMC7978348 salaries. This does not alter our  
298 adherence to all PLOS ONE policies on sharing data and materials.
- 299 12. Kim BC, Kim MK, Han K, Lee SY, Lee SH, Ko SH, et al. Low muscle mass is  
300 associated with metabolic syndrome only in nonobese young adults: the Korea  
301 National Health and Nutrition Examination Survey 2008-2010. *Nutrition research*  
302 (New York, NY). 2015;35(12):1070-8. Epub 2015/11/26. doi:  
303 10.1016/j.nutres.2015.09.020. PubMed PMID: 26602833.
- 304 13. Furushima T, Miyachi M, Iemitsu M, Murakami H, Kawano H, Gando Y, et al.  
305 Comparison between clinical significance of height-adjusted and weight-adjusted  
306 appendicular skeletal muscle mass. *J Physiol Anthropol*. 2017;36(1):15. Epub  
307 2017/02/15. doi: 10.1186/s40101-017-0130-1. PubMed PMID: 28193296; PubMed  
308 Central PMCID: PMC5307800.
- 309 14. Zhang W, Zhao Z, Sun X, Tian X. Prevalence of Metabolic Syndrome According  
310 to Absolute and Relative Values of Muscle Strength in Middle-Aged and Elderly  
311 Women. *International journal of environmental research and public health*.  
312 2021;18(17). Epub 2021/09/11. doi: 10.3390/ijerph18179073. PubMed PMID:  
313 34501662; PubMed Central PMCID: PMC8431152.
- 314 15. Fuku N, Murakami H, Iemitsu M, Sanada K, Tanaka M, Miyachi M. Mitochondrial  
315 macrohaplogroup associated with muscle power in healthy adults. *Int J Sports Med*.  
316 2012;33(5):410-4. Epub 2012/03/02. doi: 10.1055/s-0031-1301317. PubMed  
317 PMID: 22377945.
- 318 16. Yamada Y, Hashii-Arishima Y, Yokoyama K, Itoi A, Adachi T, Kimura M.  
319 Validity of a triaxial accelerometer and simplified physical activity record in older  
320 adults aged 64-96 years: a doubly labeled water study. *Eur J Appl Physiol*. 2018.  
321 Epub 2018/07/19. doi: 10.1007/s00421-018-3944-6. PubMed PMID: 30019086.

- 322 17. Yamada Y, Yokoyama K, Noriyasu R, Osaki T, Adachi T, Itoi A, et al. Light-  
323 intensity activities are important for estimating physical activity energy expenditure  
324 using uniaxial and triaxial accelerometers. *Eur J Appl Physiol*. 2009;105(1):141-52  
325 Erratum in: 16(6):1279. doi: DOI 10.1007/s00421-008-0883-7.
- 326 18. Gando Y, Yamamoto K, Murakami H, Ohmori Y, Kawakami R, Sanada K, et al.  
327 Longer time spent in light physical activity is associated with reduced arterial  
328 stiffness in older adults. *Hypertension*. 2010;56(3):540-6. Epub 2010/07/08. doi:  
329 10.1161/hypertensionaha.110.156331. PubMed PMID: 20606102.
- 330 19. Arai H, Yamamoto A, Matsuzawa Y, Saito Y, Yamada N, Oikawa S, et al.  
331 Prevalence of metabolic syndrome in the general Japanese population in 2000.  
332 *Journal of atherosclerosis and thrombosis*. 2006;13(4):202-8. Epub 2006/08/16.  
333 doi: 10.5551/jat.13.202. PubMed PMID: 16908953.
- 334 20. Kawakami R, Miyachi M, Tanisawa K, Ito T, Usui C, Midorikawa T, et al.  
335 Development and validation of a simple anthropometric equation to predict  
336 appendicular skeletal muscle mass. *Clinical Nutrition*. 2021;40(11):5523-30. doi:  
337 10.1016/j.clnu.2021.09.032.
- 338 21. Janssen I, Heymsfield SB, Ross R. Low relative skeletal muscle mass (sarcopenia)  
339 in older persons is associated with functional impairment and physical disability. *J*  
340 *Am Geriatr Soc*. 2002;50(5):889-96. Epub 2002/05/25. doi: 10.1046/j.1532-  
341 5415.2002.50216.x. PubMed PMID: 12028177.
- 342 22. Janssen I. Influence of sarcopenia on the development of physical disability: the  
343 Cardiovascular Health Study. *J Am Geriatr Soc*. 2006;54(1):56-62. Epub  
344 2006/01/20. doi: 10.1111/j.1532-5415.2005.00540.x. PubMed PMID: 16420198.
- 345 23. Kim G, Lee SE, Jun JE, Lee YB, Ahn J, Bae JC, et al. Increase in relative skeletal  
346 muscle mass over time and its inverse association with metabolic syndrome  
347 development: a 7-year retrospective cohort study. *Cardiovascular diabetology*.  
348 2018;17(1):23. Epub 2018/02/07. doi: 10.1186/s12933-018-0659-2. PubMed  
349 PMID: 29402279; PubMed Central PMCID: PMC5798183.
- 350 24. Lagacé JC, Marcotte-Chenard A, Paquin J, Tremblay D, Brochu M, Dionne IJ.  
351 Increased odds of having the metabolic syndrome with greater fat-free mass:  
352 counterintuitive results from the National Health and Nutrition Examination Survey  
353 database. *J Cachexia Sarcopenia Muscle*. 2021. Epub 2021/11/27. doi:  
354 10.1002/jcsm.12856. PubMed PMID: 34825787.
- 355 25. Goodpaster BH, Kelley DE, Thaete FL, He J, Ross R. Skeletal muscle attenuation  
356 determined by computed tomography is associated with skeletal muscle lipid  
357 content. *J Appl Physiol*. 2000;89(1):104-10.



- 358 26. Goodpaster BH, Carlson CL, Visser M, Kelley DE, Scherzinger A, Harris TB, et  
359 al. Attenuation of skeletal muscle and strength in the elderly: The Health ABC  
360 Study. *J Appl Physiol*. 2001;90(6):2157-65.
- 361 27. Fukumoto Y, Ikezoe T, Yamada Y, Tsukagoshi R, Nakamura M, Mori N, et al.  
362 Skeletal muscle quality assessed from echo intensity is associated with muscle  
363 strength of middle-aged and elderly persons. *Eur J Appl Physiol*.  
364 2012;112(4):1519-25. Epub 2011/08/19. doi: 10.1007/s00421-011-2099-5 [doi].  
365 PubMed PMID: 21847576.
- 366 28. Watanabe Y, Yamada Y, Fukumoto Y, Ishihara T, Yokoyama K, Yoshida T, et al.  
367 Echo intensity obtained from ultrasonography images reflecting muscle strength in  
368 elderly men. *Clin Interv Aging*. 2013;8:993-8. Epub 2013/08/09. doi:  
369 10.2147/CIA.S47263
- 370 29. Yamada Y, Yoshida T, Yokoyama K, Watanabe Y, Miyake M, Yamagata E, et al.  
371 The Extracellular to Intracellular Water Ratio in Upper Legs is Negatively  
372 Associated With Skeletal Muscle Strength and Gait Speed in Older People. *The*  
373 *Journals of Gerontology: Series A*. 2017;72(3):293-8. doi: 10.1093/gerona/glw125.
- 374 30. Yamada Y, Schoeller DA, Nakamura E, Morimoto T, Kimura M, Oda S.  
375 Extracellular water may mask actual muscle atrophy during aging. *The Journals of*  
376 *Gerontology Series A: Biological Sciences and Medical Sciences*.  
377 2010;65A(5):510-6.
- 378 31. Yamada Y, Nishizawa M, Uchiyama T, Kasahara Y, Shindo M, Miyachi M, et al.  
379 Developing and Validating an Age-Independent Equation Using Multi-Frequency  
380 Bioelectrical Impedance Analysis for Estimation of Appendicular Skeletal Muscle  
381 Mass and Establishing a Cutoff for Sarcopenia. *International journal of*  
382 *environmental research and public health*. 2017;14(7). Epub 2017/07/30. doi:  
383 10.3390/ijerph14070809. PubMed PMID: 28753945; PubMed Central PMCID:  
384 PMCPMC5551247.
- 385 32. Shiose K, Yamada Y, Motonaga K, Sagayama H, Higaki Y, Tanaka H, et al.  
386 Segmental extracellular and intracellular water distribution and muscle glycogen  
387 after 72-h carbohydrate loading using spectroscopic techniques. *J Appl Physiol*  
388 (1985). 2016;121(1):205-11. Epub 2016/05/28. doi:  
389 10.1152/jappphysiol.00126.2016. PubMed PMID: 27231310.
- 390 33. Shiose K, Tanabe Y, Ohnishi T, Takahashi H. Effect of regional muscle damage  
391 and inflammation following eccentric exercise on electrical resistance and the body  
392 composition assessment using bioimpedance spectroscopy. *The journal of*

393 physiological sciences : JPS. 2019;69(6):895-901. Epub 2019/08/08. doi:  
394 10.1007/s12576-019-00702-8. PubMed PMID: 31388975.  
395 34. Shiose K, Yamada Y, Motonaga K, Takahashi H. Circadian variation of  
396 extracellular and intracellular resistance of the leg, arm, and trunk in healthy  
397 humans: a segmental bioimpedance spectroscopy study. Biomedical Physics &  
398 Engineering Express. 2017;3(6):065007. doi: 10.1088/2057-1976/aa87c0.  
399  
400

401 Figure legend

402

403 **Fig. 1** Kaplan-Meier curves for events of incident metabolic syndrome (MetS) according  
404 to baseline skeletal muscle index (SMI, %). Bold line shows normal SMI, and dashed line  
405 shows Class I sarcopenia. The SMI was calculated as ALM divided by body weight  $\times$   
406 100 (%).

407

408 **Fig. 2** Kaplan-Meier curves for events of incident metabolic syndrome (MetS) according  
409 to baseline ALM/BMI. Bold line shows normal ALM/BMI, and dashed line shows Class  
410 I sarcopenia.

411

412 **Fig. 3** Kaplan-Meier curves for events of incident metabolic syndrome (MetS) according  
413 to baseline leg power (W/kg). Bold line shows normal leg power, and dashed line shows  
414 low leg power.

415

416

417

**Table 1. Baseline characteristics of the study subjects according to SMI group (N = 346)**

| SMI (%)                   | Normal SMI |   |       | Class I sarcopenia |   |       | P value |
|---------------------------|------------|---|-------|--------------------|---|-------|---------|
|                           | Above Ave. |   |       | Below Ave.         |   |       |         |
|                           | ≥32%       |   |       | 28%-32%            |   |       |         |
|                           | n = 81     |   |       | n = 184            |   |       |         |
|                           | mean       | ± | SD    | mean               | ± | SD    |         |
| Age (y)                   | 54.1       | ± | 11.7  | 56.6               | ± | 11.6  | 0.24    |
| Weight (kg)               | 48.5       | ± | 5.0   | 53.9               | ± | 5.3   | <0.001  |
| BMI (kg/m <sup>2</sup> )  | 19.7       | ± | 1.5   | 21.9               | ± | 2.1   | <0.001  |
| Waist circumference (cm)  | 73.3       | ± | 6.2   | 80.4               | ± | 7.1   | <0.001  |
| SMI (%)                   | 33.4       | ± | 1.4   | 30.0               | ± | 1.1   | <0.001  |
| ALM/BMI                   | 0.825      | ± | 0.079 | 0.740              | ± | 0.060 | <0.001  |
| HbA1c (%)                 | 5.4        | ± | 0.5   | 5.5                | ± | 0.4   | 0.115   |
| Fasting glucose (mg/dL)   | 89.2       | ± | 14.2  | 89.6               | ± | 11.1  | 0.015   |
| HOMA-IR                   | 0.69       | ± | 0.38  | 0.86               | ± | 0.36  | <0.001  |
| SBP (mmHg)                | 114.2      | ± | 18.3  | 120.0              | ± | 16.8  | 0.008   |
| DBP (mmHg)                | 67.9       | ± | 10.8  | 71.3               | ± | 10.4  | 0.020   |
| HR (bpm)                  | 58.2       | ± | 8.3   | 59.8               | ± | 9.3   | 0.093   |
| Total cholesterol (mg/dL) | 210.0      | ± | 37.7  | 221.1              | ± | 35.4  | 0.055   |
| Triglycerides (mg/dL)     | 70.1       | ± | 31.4  | 83.0               | ± | 43.1  | <0.001  |
| HDL cholesterol (mg/dL)   | 75.5       | ± | 14.7  | 72.7               | ± | 17.8  | <0.001  |
| LDL cholesterol (mg/dL)   | 120.1      | ± | 32.0  | 131.4              | ± | 30.4  | 0.004   |
| PA (METs*hour)            | 4.4        | ± | 2.9   | 3.8                | ± | 1.7   | 0.077   |
| Leg Power (W/kg)          | 16.3       | ± | 3.4   | 14.7               | ± | 4.1   | <0.001  |

SMI, skeletal muscle mass index; BMI, body mass index; ALM, appendicular lean mass; SBP, systolic blood pressure; DBP, diastolic blood pressure; HR, heart rate; HDL, high density lipoprotein; LDL, low density lipoprotein; PA, physical activity.

418

419

**Table 2 Association between baseline relative muscle mass or power and incidence of metabolic syndrome (Cox model) (N = 346)**

|                    | Model 1                       | Model 2                       | Model 3                       |
|--------------------|-------------------------------|-------------------------------|-------------------------------|
|                    | HR (95%CI)                    | HR (95%CI)                    | HR (95%CI)                    |
| Normal SMI         | 1 (ref)                       | 1 (ref)                       | 1 (ref)                       |
| Class I Sarcopenia | 2.61 (1.14-5.98)<br>P = 0.023 | 3.16 (1.35-7.39)<br>P = 0.008 | 3.22 (1.25-8.27)<br>P = 0.015 |
| Normal ALM/BMI     | 1 (ref)                       | 1 (ref)                       | 1 (ref)                       |
| Class I Sarcopenia | 3.88 (1.74-8.68)<br>P = 0.001 | 3.52 (1.57-7.92)<br>P = 0.002 | 3.19 (1.31-7.74)<br>P = 0.010 |
| Normal leg power   | 1 (ref)                       | 1 (ref)                       | 1 (ref)                       |
| Low leg power      | 2.34 (1.05-5.22)<br>P = 0.037 | 1.67 (0.74-3.84)<br>P = 0.214 | 1.23 (0.50-3.04)<br>P = 0.654 |

---

SMI, skeletal muscle mass index; BMI, body mass index; ALM, appendicular lean mass; HR, hazard ratio; CI, confidence interval.

Model 1: crude

Model 2: Model 1 + further adjusted for age

Model 3: Model 2 + further adjusted for family history of diabetes, smoking status, physical activity

420

421

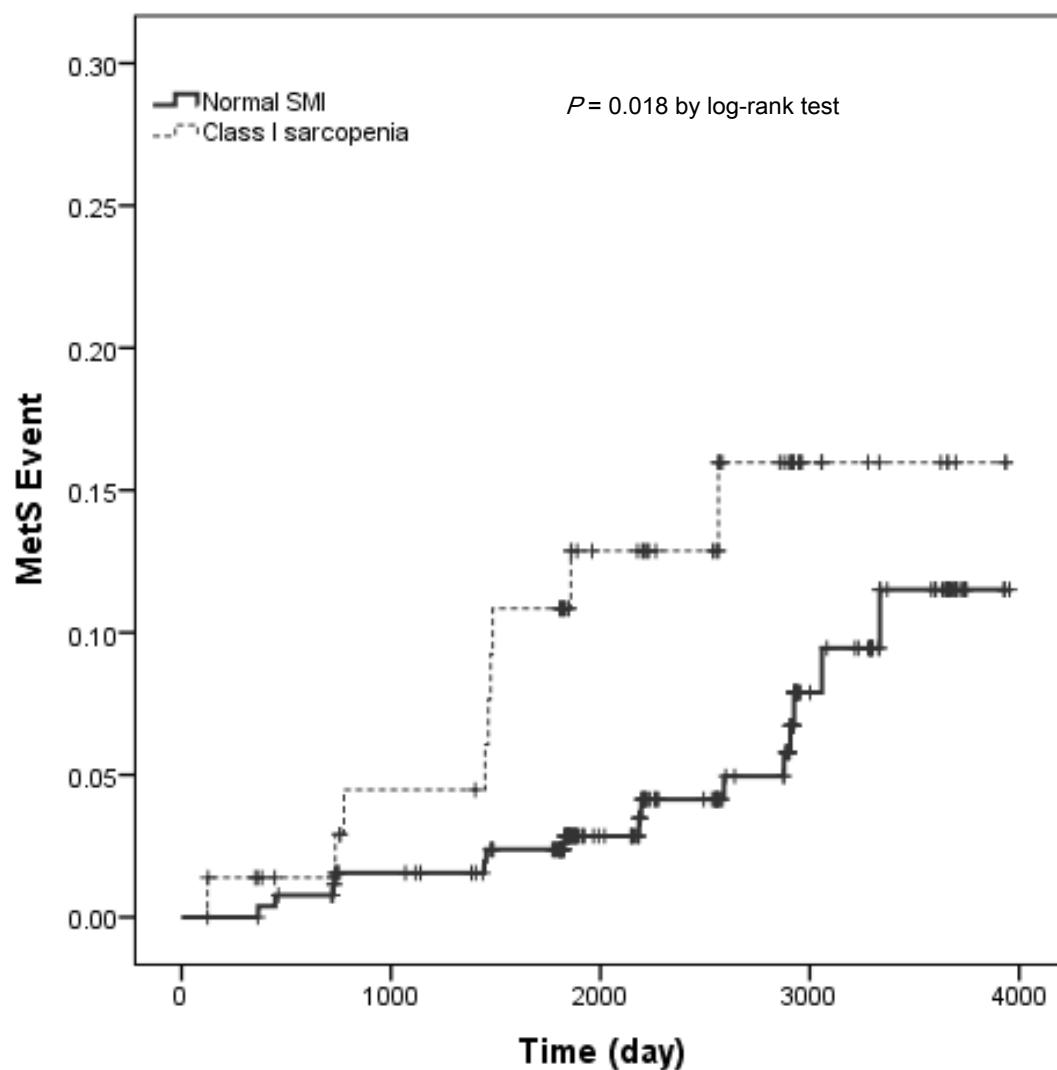

422 Fig. 1  
423

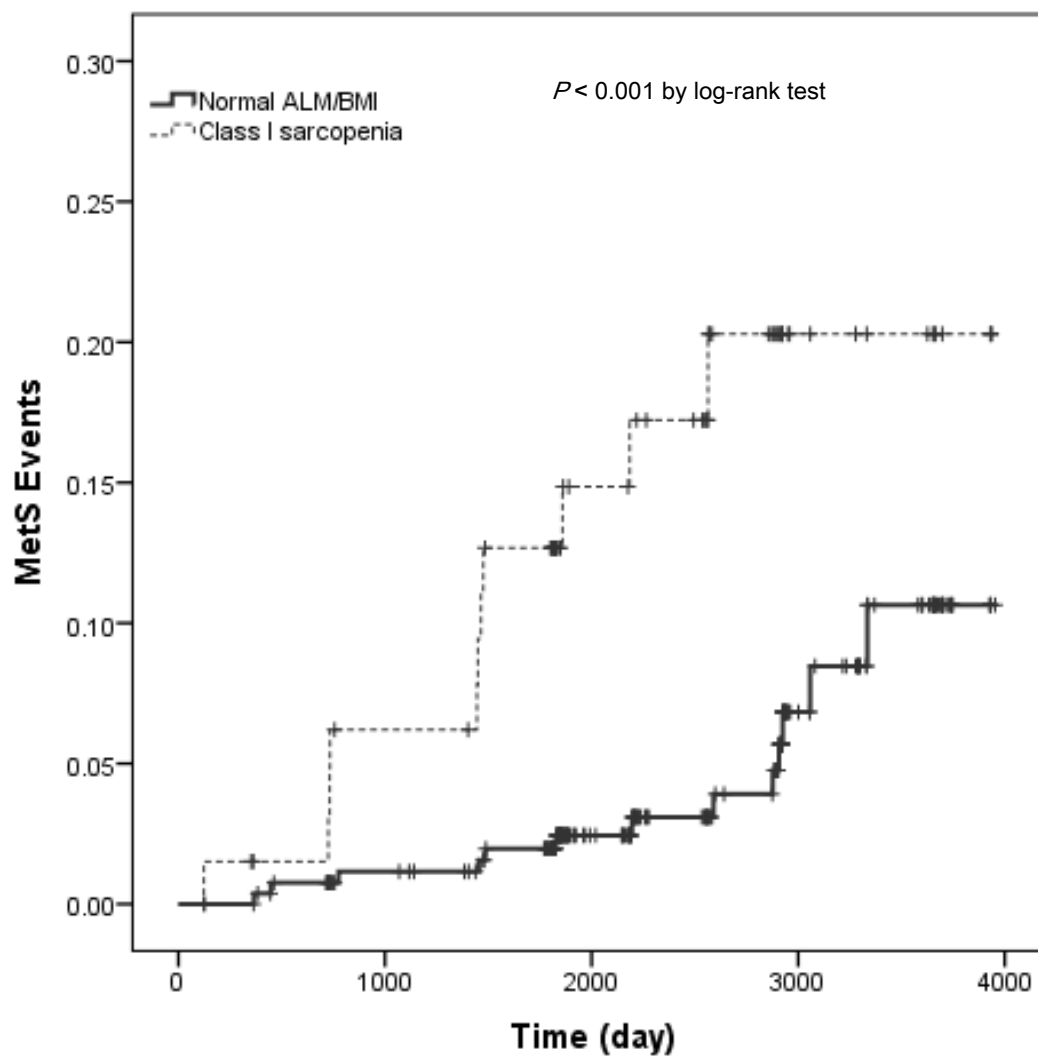

424

425 **Fig. 2**

426

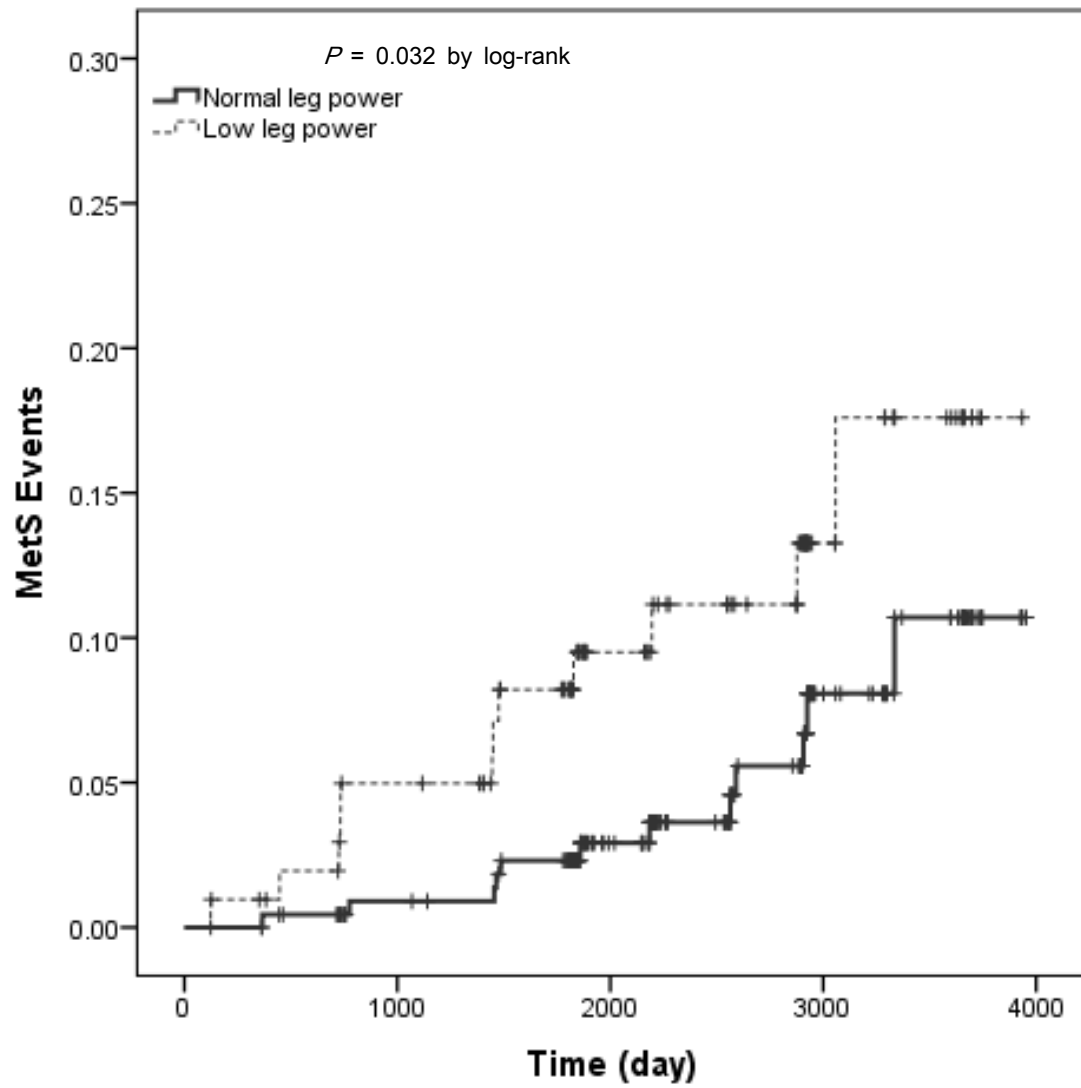

427

428 **Fig. 3**

429
